# Supplementary material for: Proteome-Wide Analysis of Disease-Associated SNPs That Show Allele-Specific Transcription Factor Binding
Source: PubMed Central journal article supplement (PMC3459973; doi:10.1371/journal.pgen.1002982), 2012-09-27
Supplement: pgen.1002982.s002.pdf [file pgen.1002982.s002.pdf]

**Table S1**

|                 |                                                |
|-----------------|------------------------------------------------|
| AP2_C_for       | AACAAACTGCAGGATCGAACTGACCGCCCGGGGCACGTGTC      |
| AP2_C_rev       | TTGACACGTGCCCCGGGCGGTTCAGTTCGATCCTGCAGTTTTG    |
| AP2_A_for       | AACAAACTGCAGGATCGAACTGACCGCACGGGGCACGTGTC      |
| AP2_A_rev       | TTGACACGTGCCCCGTGCGGTTCAGTTCGATCCTGCAGTTTTG    |
| rs509813C_for   | AAGGCTTGGGCTCCTCCCCCAGCCAAC                    |
| rs509813C_rev   | TTGTTGGCTGGGGGAGGAGCCCAAGCC                    |
| rs509813G_for   | AAGGCTTGGGCTCCTCCCCCAGCCAAC                    |
| rs509813G_rev   | TTGTTGGCTGGCGGGAGGAGCCCAAGCC                   |
| rs2104286A_for  | TTAGTCATGGTAACACAAGTCATATGTGGTAAGATCTAC        |
| rs2104286A_rev  | AAGTAGATCTTACCACATATGACTTGTGTACCATGACT         |
| rs2104286G_for  | TTAGTCATGGTAACACAAGTCGTAATGTGGTAAGATCTAC       |
| rs2104286G_rev  | AAGTAGATCTTACCACATACGACTTGTGTACCATGACT         |
| rs11594656A_for | TTCCGTTCCCTGGTCTGTAGAGAGAAGGCATCATAGTGAG       |
| rs11594656A_rev | AACTCACTATGATGCCTTCTCTACAGACCAAGGAACCG         |
| rs11594656T_for | TTCCGTTCCCTGGTCTGTAGAGTAAGGCATCATAGTGAG        |
| rs11594656T_rev | AACTCACTATGATGCCTTCACTCTACAGACCAAGGAACCG       |
| rs41295061A_for | TTGAACCCAGAAGCGACATTAGAAAGGGGTTCGTTTCACGGAATC  |
| rs41295061A_rev | AAGATTCCGTGAAACGAACCCCTTCTAATGTTCGCTTCTGGGTTTC |
| rs41295061C_for | TTGAACCCAGAAGCGACATTAGCAAGGGGTTCGTTTCACGGAATC  |
| rs41295061C_rev | AAGATTCCGTGAAACGAACCCCTTCTAATGTTCGCTTCTGGGTTTC |
| rs12722522C_for | TTGAAAGAGGGCTCATAATCCACGTGAGGAAGAGCCGCTGGC     |
| rs12722522C_rev | AAGCCAGCGGCTCTCCCTGACGTGGAATATGAGCCCTCTTTC     |
| rs12722522T_for | TTGAAAGAGGGCTCATAATCCATGTGAGGAAGAGCCGCTGGC     |
| rs12722522T_rev | AAGCCAGCGGCTCTCCCTGACATGGAATATGAGCCCTCTTTC     |
| rs12722508A_for | TTGAAAAGAATAGAACCCACCCACAGAACTATCAGAGATCAAATG  |
| rs12722508A_rev | AACATTTGATCTCTGATAGTTCTGTGGGTGGGTCTATTCTTTTC   |
| rs12722508T_for | TTGAAAAGAATAGAACCCACCCACTGAACTATCAGAGATCAAATG  |
| rs12722508T_rev | AACATTTGATCTCTGATAGTTTCAGTGGGTGGGTCTATTCTTTTC  |
| rs12722495A_for | TTCCAGTTCCTTGAATACTTCCAATCGCACTTAGGATTGAAAC    |
| rs12722495A_rev | AAGTTTCAATCCTAAGTGCGATTTGGAAGTATTCAGGAACTGG    |
| rs12722495G_for | TTCCAGTTCCTTGAATACTTCCAAGTTCGCACTTAGGATTGAAAC  |
| rs12722495G_rev | AAGTTTCAATCCTAAGTGCGACTTGGAAAGTATTCAGGAACTGG   |
| rs41295049A_for | TTGGTATAACATGCAAATGAGAGATGCCAGGGCAAGAAAACCTTG  |
| rs41295049A_rev | AACAAGTTTTCTTGCCTGGGCATCTCTCATTGTCATGTATACC    |
| rs41295049G_for | TTGGTATAACATGCAAATGAGAGGTGCCAGGGCAAGAAAACCTTG  |
| rs41295049G_rev | AACAAGTTTTCTTGCCTGGGCACCTCTCATTGTCATGTATACC    |
| rs41295065A_for | TTGGAGGAAAAGAGAAGAATCAACATGACTCAGATTTCTGGCTTG  |
| rs41295065A_rev | AACAAGCCAGAAATCTGAGTCATGTTGATCTTCTCTTTTCTCTCC  |
| rs41295065G_for | TTGGAGGAAAAGAGAAGAATCAACGTGACTCAGATTTCTGGCTTG  |
| rs41295065G_rev | AACAAGCCAGAAATCTGAGTCACGTTGATCTTCTCTTTTCTCTCC  |
| rs41295063A_for | TTGCTGGAGTGCAACAGTGAATCTCAGCTCACTGCAACTTC      |
| rs41295063A_rev | AAGAAGTTGCAGTGAGCTGAGATTGCACTGTTGCACTCCAGC     |
| rs41295063G_for | TTGCTGGAGTGCAACAGTGCAGTCTCAGCTCACTGCAACTTC     |
| rs41295063G_rev | AAGAAGTTGCAGTGAGCTGAGACTGCAGTCTGCACTCCAGC      |
| rs7909519G_for  | TTAATAGTCAATATAAATAAAATGATTACTTATGCAGTAATTA    |
| rs7909519G_rev  | AATAATTACTGCATAAGTAATCATTTAATTATATTGACTATT     |
| rs7909519T_for  | TTAATAGTCAATATAAATAAAATTAATTACTTATGCAGTAATTA   |
| rs7909519T_rev  | AATAATTACTGCATAAGTAATAAATTTAATTATATTGACTATT    |
| rs11597367A_for | TTGGATTACAAGTGTGAGCCACCACCCAGCGGTTGTGGGCA      |
| rs11597367A_rev | AATGCCACAAACCGCTGGGTGTGGTGGCTCACACTGTAATCC     |
| rs11597367G_for | TTGGATTACAAGTGTGAGCCACCCAGCGGTTGTGGGCA         |
| rs11597367G_rev | AATGCCACAAACCGCTGGGTGCGGTGGCTCACACTGTAATCC     |
| rs35285258C_for | TTCTTTTTTAACCTCTATCCCACTCATTATACCAAGATCAAA     |
| rs35285258C_rev | AATTTGATCTTGGTATAATGAGTGGGATAGAAGTTAAAAAAG     |
| rs35285258T_for | TTCTTTTTTAACCTCTATCCCACTCATTATACCAAGATCAAA     |
| rs35285258T_rev | AATTTGATCTTGGTATAATGAATGGGATAGAAGTTAAAAAAG     |
